# Supplementary material for: Safety, Immunogenicity, and Efficacy of COVID-19 Vaccines in Children and Adolescents: A Systematic Review
Source: MDPI journal article supplement (doi:10.3390/vaccines9101102), 2021-09-29
Supplement: s1 [file s1]

**Supplementary Table S2. Detailed Search Strategy**

|                               |                                            |
|-------------------------------|--------------------------------------------|
| <b>PubMed (N=1033)</b>        |                                            |
| #1                            | "COVID-19"[Mesh]                           |
| #2                            | "SARS-CoV-2"[Mesh]                         |
| #3                            | "COVID-19"[Title/Abstract]                 |
| #4                            | "SARS-COV-2"[Title/Abstract]               |
| #5                            | "SARS COV 2"[Title/Abstract]               |
| #6                            | "Novel coronavirus"[Title/Abstract]        |
| #7                            | "2019-novel coronavirus"[Title/Abstract]   |
| #8                            | "Coronavirus disease-19"[Title/Abstract]   |
| #9                            | "Coronavirus disease 19"[Title/Abstract]   |
| #10                           | "Coronavirus disease 2019"[Title/Abstract] |
| #11                           | "COVID 19"[Title/Abstract]                 |
| #12                           | "Novel CoV"[Title/Abstract]                |
| #13                           | "2019-nCoV"[Title/Abstract]                |
| #14                           | "2019 nCoV"[Title/Abstract]                |
| #15                           | "2019-CoV"[Title/Abstract]                 |
| #16                           | OR/#1-#15                                  |
| #17                           | "vaccin*"[Title/Abstract]                  |
| #18                           | "Vaccines"[Mesh]                           |
| #19                           | #17 OR #18                                 |
| #20                           | #16 AND #19                                |
| #21                           | "COVID-19 Vaccines"[Mesh]                  |
| #22                           | #20 OR #21                                 |
| #23                           | "Adolescent"[Mesh]                         |
| #24                           | "Adolescen*"[Title/Abstract]               |
| #25                           | "Teen*"[Title/Abstract]                    |
| #26                           | "Youth*"[Title/Abstract]                   |
| #27                           | "juvenile*"[Title/Abstract]                |
| #28                           | "puberty"[Title/Abstract]                  |
| #29                           | "young*"[Title/Abstract]                   |
| #30                           | "Child" [Mesh]                             |
| #31                           | "child*" [Title/Abstract]                  |
| #32                           | "Pediatrics" [Mesh]                        |
| <b>Web of Science (N=913)</b> |                                            |
| #1                            | "SARS-CoV-2"[Topic]                        |
| #2                            | "Novel coronavirus"[Topic]                 |
| #3                            | "2019-novel coronavirus"[Topic]            |
| #4                            | "Coronavirus disease 19"[Topic]            |
| #5                            | "Coronavirus disease 2019"[Topic]          |
| #6                            | "COVID-19"[Topic]                          |
| #7                            | "Novel CoV"[Topic]                         |
| #8                            | "2019-nCoV"[Topic]                         |

#9 OR/#1-#8  
 #10 Adolescenc\* (Topic)  
 #11 young\* (Topic)  
 #12 Pediatrics (Topic)  
 #13 Child\* (Topic)  
 #14 Infant (Topic)  
 #15 newborn\* (Topic)  
 #16 neonat\* (Topic)  
 #17 Youth\* (Topic)  
 #18 student\* (Topic)  
 #19 OR/#10-#18  
 #20 vaccin\* (Topic)  
 #21 #9 AND #19 AND 20  
 #22 #21 AND limit Database: Pediatrics (Research Areas)

**WHO (N=1006)**

#1 tw:(adolescenc\*)  
 #2 tw:(teen\*)  
 #3 tw:(youth\*)  
 #4 tw:(juvenile\*)  
 #5 tw:(puberty)  
 #6 tw:(young\*)  
 #7 tw:(child\*)  
 #8 tw:(pediatric\*)  
 #9 tw:(paediatric\*)  
 #10 tw:(infant\*)  
 #11 tw:(neonat\*)  
 #12 tw:(newborn\*)  
 #13 tw:(baby)  
 #14 tw:(trottie\*)  
 #15 tw:(babies)  
 #16 tw:(kids)  
 #17 tw:(toddler\*)  
 #18 tw:(pre-school\*)  
 #19 tw:(preschool\*)  
 #20 tw:(kindergarten\*)  
 #21 tw:(kinder-garten\*)  
 #22 tw:(girl\*)  
 #23 tw:(boy\*)  
 #24 tw:(student\*)  
 #25 tw:(junior\*)  
 #26 tw:(pubescent)  
 #27 OR/#1-#26  
 #28 tw:(vaccin\*\*)  
 #29 #27 AND #28

#30 #29 AND la:("en")

**CNKI (N=76)**

#1 '儿童' (TOPIC)

#2 '幼儿' (TOPIC)

#3 '婴儿' (TOPIC)

#4 '新生儿' (TOPIC)

#5 '青少年' (TOPIC)

#6 '小儿' (TOPIC)

#7 OR/#1-#6

#8 '新型冠状病毒' (TOPIC)

#9 'COVID-19' (TOPIC)

#10 'COVID 19' (TOPIC)

#11 '2019-nCoV' (TOPIC)

#12 '2019 nCoV' (TOPIC)

#13 '2019-CoV' (TOPIC)

#14 '2019 CoV' (TOPIC)

#15 'SARS-CoV-2' (TOPIC)

#16 'SARS COV 2' (TOPIC)

#17 '新冠肺炎' (TOPIC)

#18 OR/#8-#17

#19 '疫苗' (TOPIC)

#20 '接种' (TOPIC)

#21 '免疫' (TOPIC)

#22 OR/#19-#21

#23 #1 AND #7 AND #18
